# Supplementary material for: Mutant lamins cause nuclear envelope rupture and DNA damage in skeletal muscle cells
Source: bioRxiv or medRxiv preprint supplement (doi:10.1101/364778), 2019-08-17
Supplement: Supplementary file [file 364778-1.pdf]

## SUPPLEMENTAL FIGURES

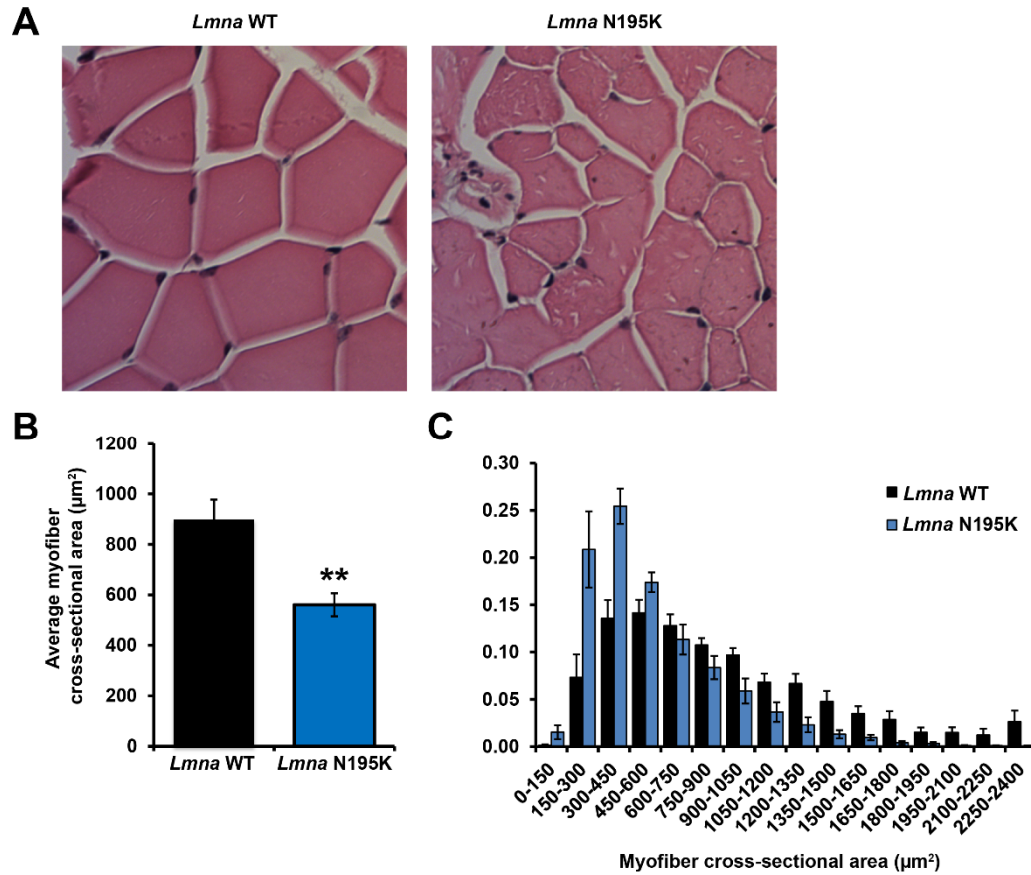

**Supplemental Figure 1.** *Lmna* N195K mice develop muscular dystrophy. (A) Representative H & E images of skeletal muscle from *Lmna* WT and *Lmna* N195K animal. Scale bar =20  $\mu\text{m}$ . (B) Quantification of the average myofiber cross-sectional area of *Lmna* WT and *Lmna* N195K mice. (C) Relative frequency of myofiber cross-sectional area in *Lmna* WT and *Lmna* N195K mice.  $n = 11-12$  animals per genotype.

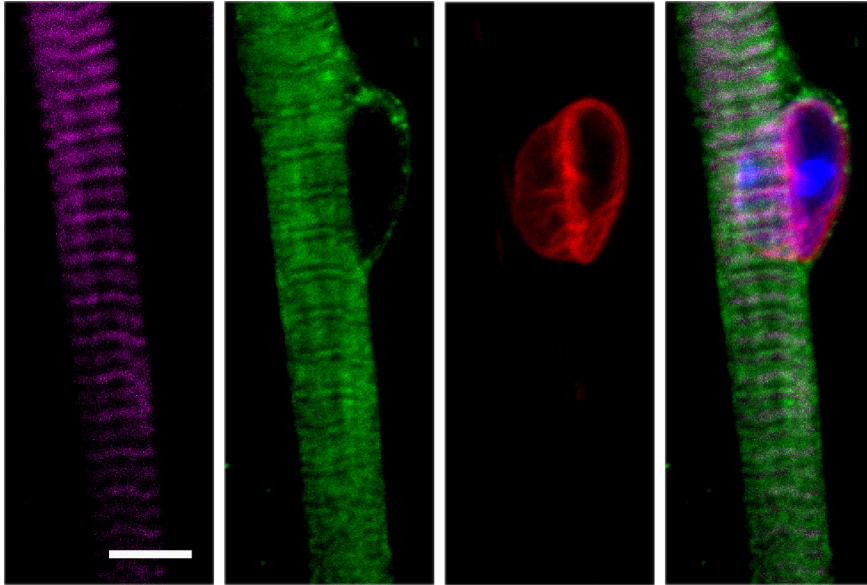

Actin Myosin heavy chain Lamin B1 DNA

**Supplemental Figure 2.** *In vitro* differentiation results in mature myofibers. Representative image of a striated myofiber containing a peripheral nucleus at day 10 of differentiation. Scale bar = 5  $\mu\text{m}$ .

### Health score for myofibers

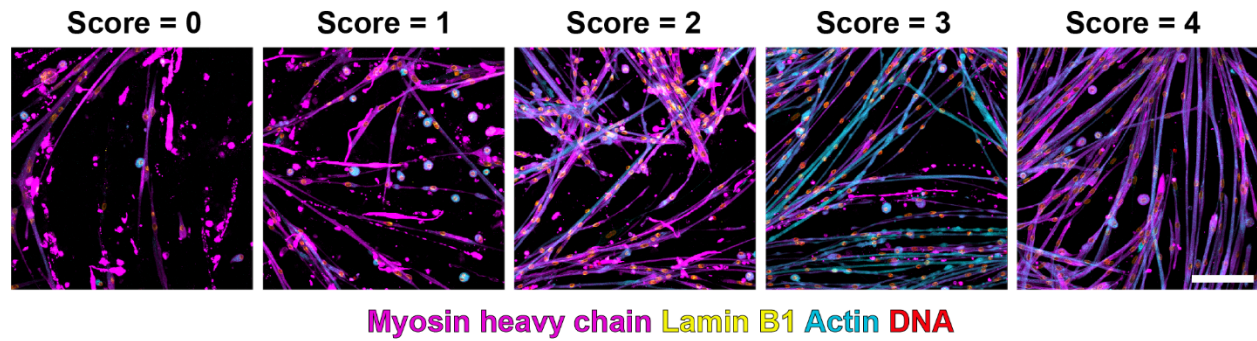

**Supplemental Figure 3.** Myofiber health scores. Panel of representative images for different myofiber health scores used for quantification of myofiber health. Scale bar = 50  $\mu$ m.

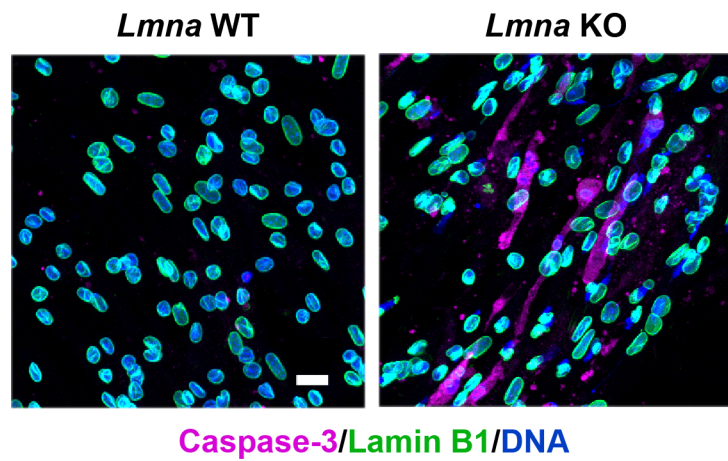

**Supplemental Figure 4.** *Lmna* mutant myofibers show increased caspase-3 activity. Representative image of immunofluorescence detection of active caspase-3 at day 10 of differentiation. Scale bar = 20  $\mu$ m.

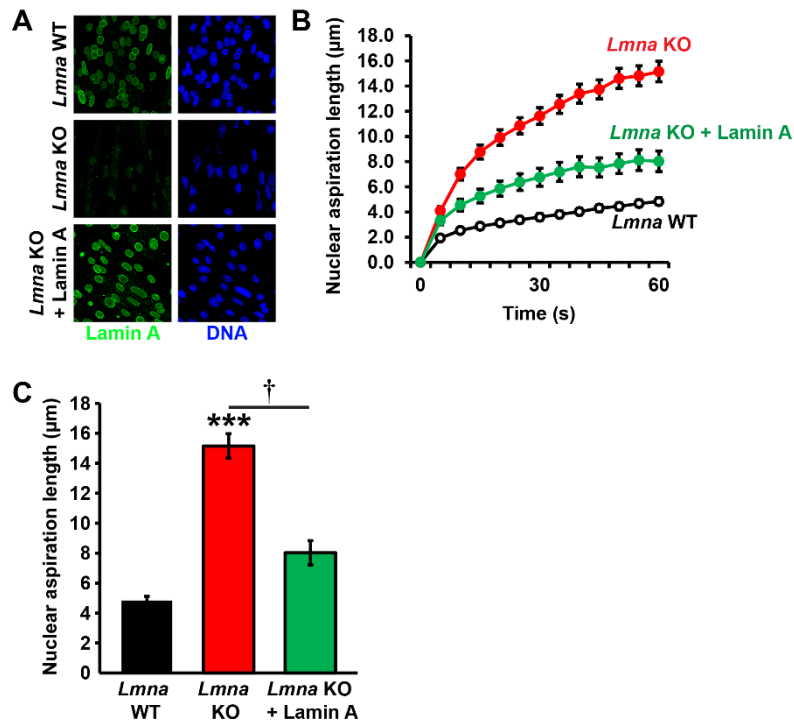

**Supplemental Figure 5.** Micropipette aspiration analysis of *Lmna* mutant myoblasts and *Lmna* KO myoblasts ectopically expressing lamin A. **(A)** Natural log transformation and plot of the micropipette aspiration data shown in Fig. 2B. The log-log data fits a linear regression model, in which all three *Lmna* mutants were significantly different ( $p < 0.001$ ) from the wild-type controls. The slopes of the log-log data were not significantly different between the samples. A multilevel model including day-to-day variability confirmed that all three *Lmna* mutants were significantly different from the wild-type controls ( $p < 0.0001$  for *Lmna* KO and *Lmna* N195K;  $p < 0.001$  for *Lmna* H222P), although the statistical significance for the *Lmna* H222P myoblasts was lost when including additional variance components. **(B)** Representative immunofluorescence images of lamin A expression in *Lmna* WT, *Lmna* KO and *Lmna* KO cells ectopically expressing lamin A (*Lmna* KO + lamin A). **(C)** Measurement for nuclear deformation at 5 second intervals for *Lmna* WT, *Lmna* KO, and *Lmna* KO + Lamin A myoblasts during 60 seconds of aspiration. **(D)** Quantification of the nuclear deformation after 60 seconds of aspiration, showing that ectopic expression of lamin A significantly improves nuclear stiffness in *Lmna* KO myoblasts.  $n = 41-67$  nuclei per genotype from 3 independent experiments.  $n = 62-73$  nuclei per genotype from 3 independent experiments. \*\*\*,  $p < 0.001$  vs *Lmna* WT cells. †,  $p < 0.01$  vs. *Lmna* KO cells.

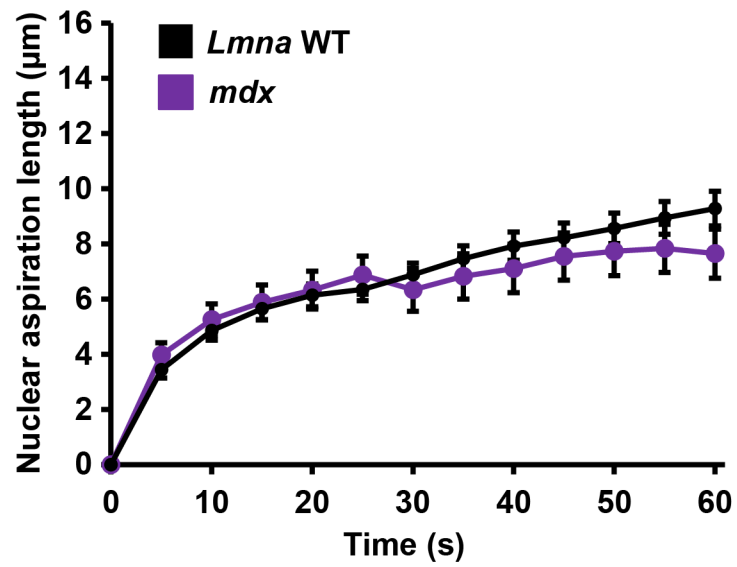

**Supplemental Figure 6.** *Mdx* myoblasts have normal nuclear stiffness. Measurement for nuclear deformation at 5 second intervals for *Lmna* WT and *mdx* myoblasts during 60 seconds of aspiration.  $n = 35-67$  cells per condition.

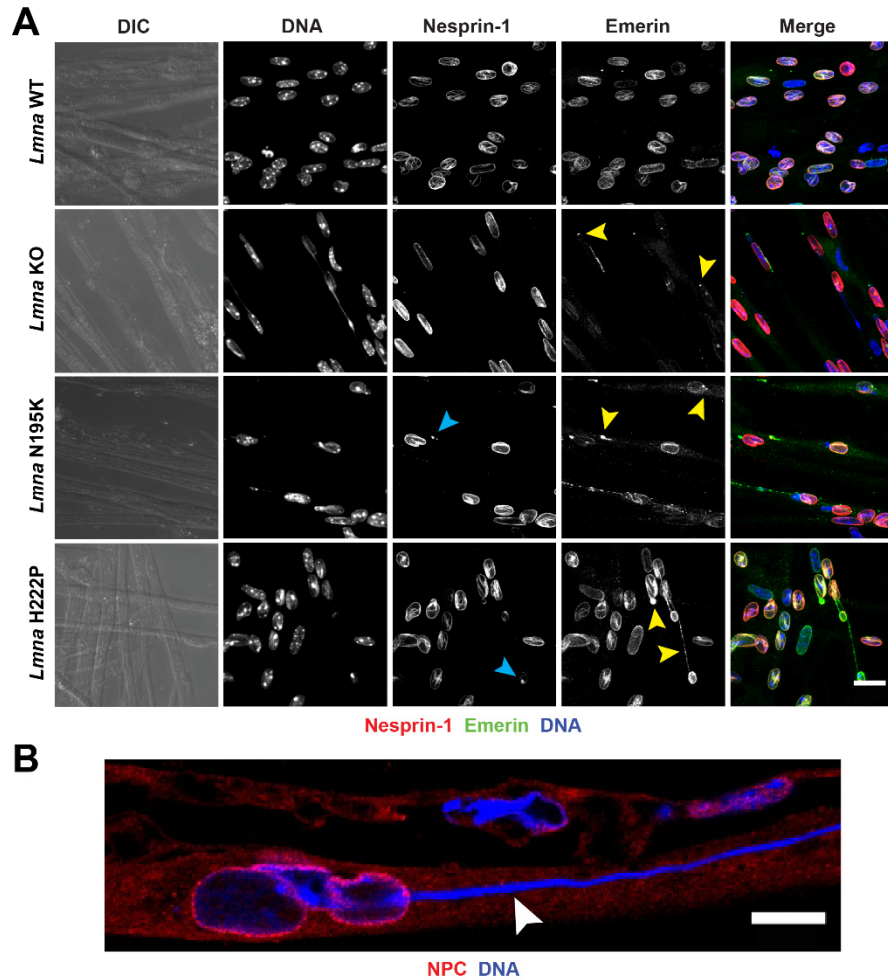

**Supplemental Figure 7.** Chromatin protrusions are surrounded by nuclear membranes containing emerin, with disturbed localization of nesprin-1 and nuclear pores. **(A)** Representative immunofluorescence images for nesprin-1 and emerin in *Lmna* WT, *Lmna* KO, *Lmna* N195K and *Lmna* H222P myofibers at day 5 of differentiation. Blue and yellow arrows denote chromatin protrusions that are enriched with nesprin-1 and emerin, respectively. Scale bar = 20  $\mu$ m. **(B)** Representative image of immunofluorescence detection of nuclear pore complexes (NPC) in *Lmna* KO myofibers at day 10 of differentiation. Scale bar = 10  $\mu$ m.

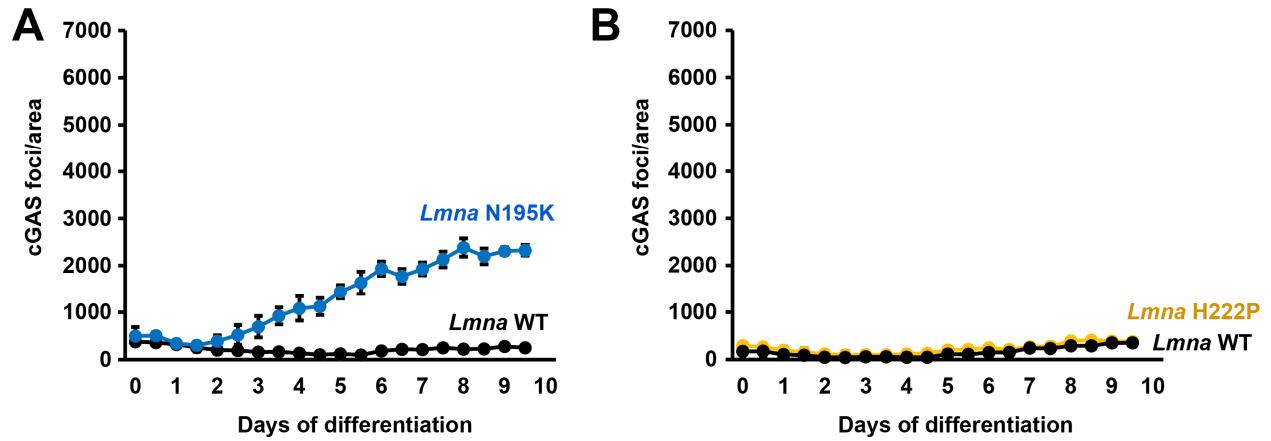

**Supplemental Figure 8.** Nuclear envelope rupture is increased in *Lmna* N195K myofibers. Quantification of cGAS-mCherry nuclear envelope rupture reporter foci formation during 10 myofiber differentiation in *Lmna* N195K, *Lmna* H222P, and *Lmna* WT cells.



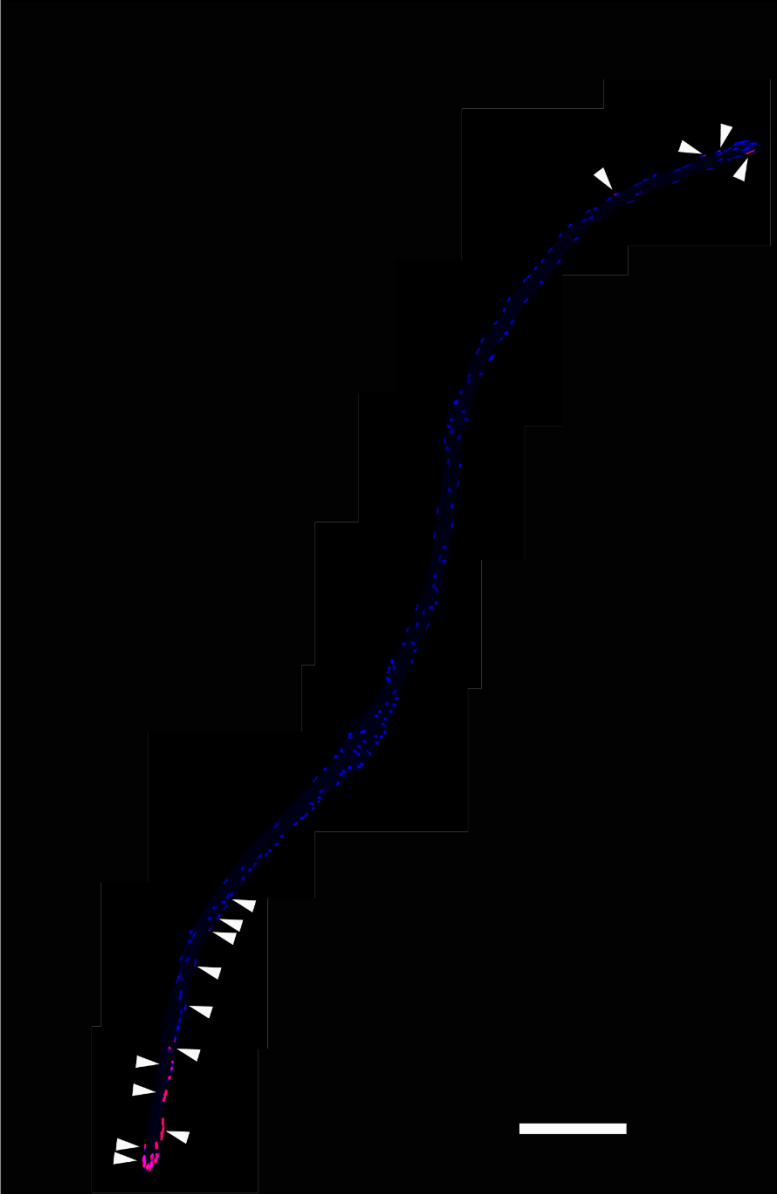

**Supplemental Figure 9.** Nuclear envelope rupture in *Lmna* KO muscle fibers is increased at myotendinous junctions. Representative image of a single isolated muscle fiber demonstrating the enrichment of cGAS+ nuclei at the myotendinous junctions. Scale bar = 200  $\mu$ m.

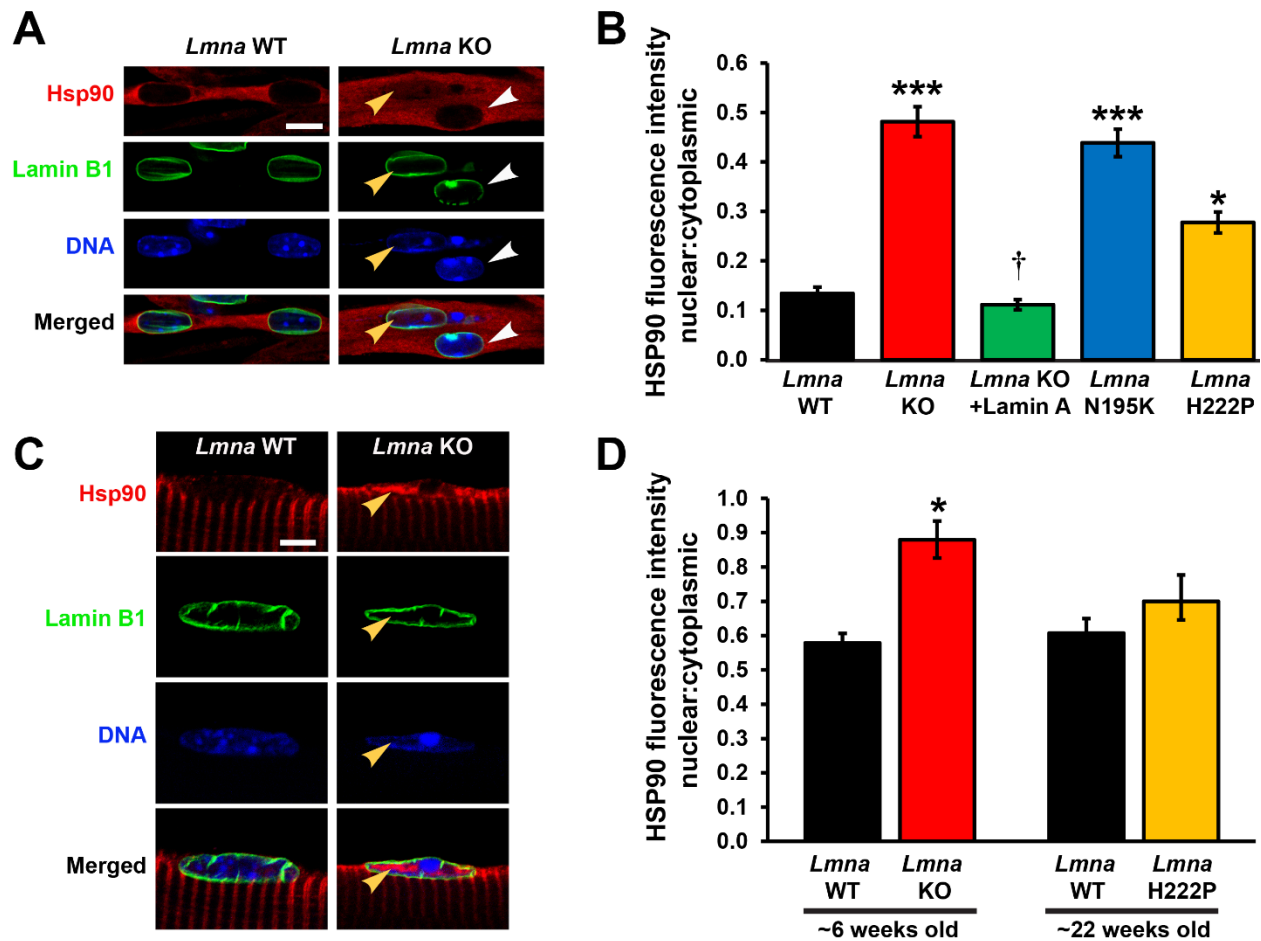

**Supplemental Figure 10.** *Lmna* mutant myonuclei have increased presence of Hsp90 *in vitro* and *in vivo*. (A) Representative image of nuclear localization of a large cytosolic protein, Hsp90, inside *Lmna* KO nuclei in myofiber differentiated for 10 days. White arrow indicates a nucleus with no observable chromatin defect and little Hsp90 nuclear accumulation, while the yellow arrow marks a nucleus with a chromatin protrusion and increased nuclear Hsp90 accumulation. Scale bar = 10 $\mu$ m. (B) Quantification of the fluorescence intensity of nuclear Hsp90 levels for *Lmna* WT, *Lmna* KO, *Lmna* KO + Lamin A, *Lmna* N195K and *Lmna* H222P myofibers *in vitro*. For each nucleus, the nuclear fluorescence intensity was normalized to the cytosolic intensity immediately adjacent to each nucleus.  $n = 25-56$  nuclei per genotype from 3 independent experiments. \*\*\*,  $p < 0.001$  vs. *Lmna* WT ( $p < 0.001$ ). (C) Representative image of Hsp90 nuclear localization in myonuclei from *Lmna* WT and *Lmna* KO mice. Scale bar = 10  $\mu$ m. (D) Quantification of the fluorescence intensity of nuclear HSP90 levels for *Lmna* WT, *Lmna* KO, and *Lmna* H222P isolated single fibers. For each nucleus, the nuclear fluorescence intensity was normalized to the cytosolic intensity immediately beside each nucleus  $n = 25-56$  nuclei per genotype from 3 independent experiments. \*\*\*,  $p < 0.001$  vs. *Lmna* WT.

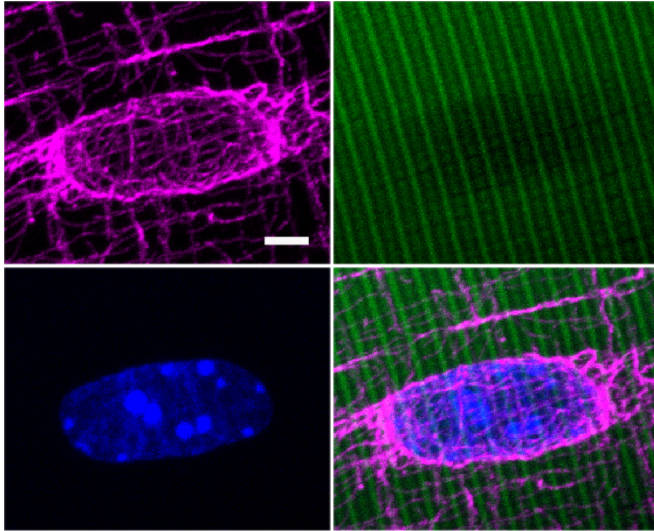

$\alpha$ -Tubulin Actin DNA

**Supplemental Figure 11.** Microtubules for cage-like structures around myonuclei. Representative immunofluorescence image of an isolated *Lmna* WT muscle fiber stained for tubulin (magenta), F-actin (green), and DNA (blue), showing characteristic ‘microtubule cage’ around myonucleus. Scale bar = 5  $\mu$ m.

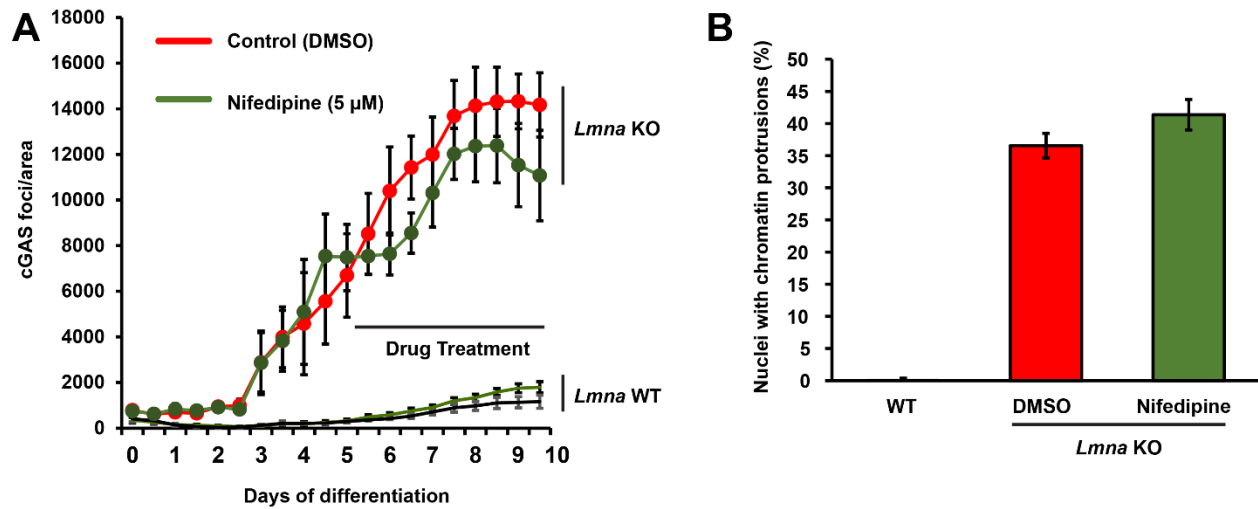

**Supplemental Figure 12.** Inhibiting myofiber contractility does not prevent nuclear envelope rupture in *Lmna* KO myofibers. (A) Quantification of cGAS-mCherry foci formation during 10 day myofiber differentiation follow treatment with nifedipine (5  $\mu$ M), which inhibits contractility, or DMSO vehicle control, starting at day 5 of differentiation.  $N = 3$  independent experiments. (B) Quantification of chromatin protrusions at day 7 of differentiation following treatment with nifedipine (5  $\mu$ M) or DMSO, starting at day 4. Data generated from  $n = 3$  independent experiments in which 27-53 nuclei were analyzed per genotype.

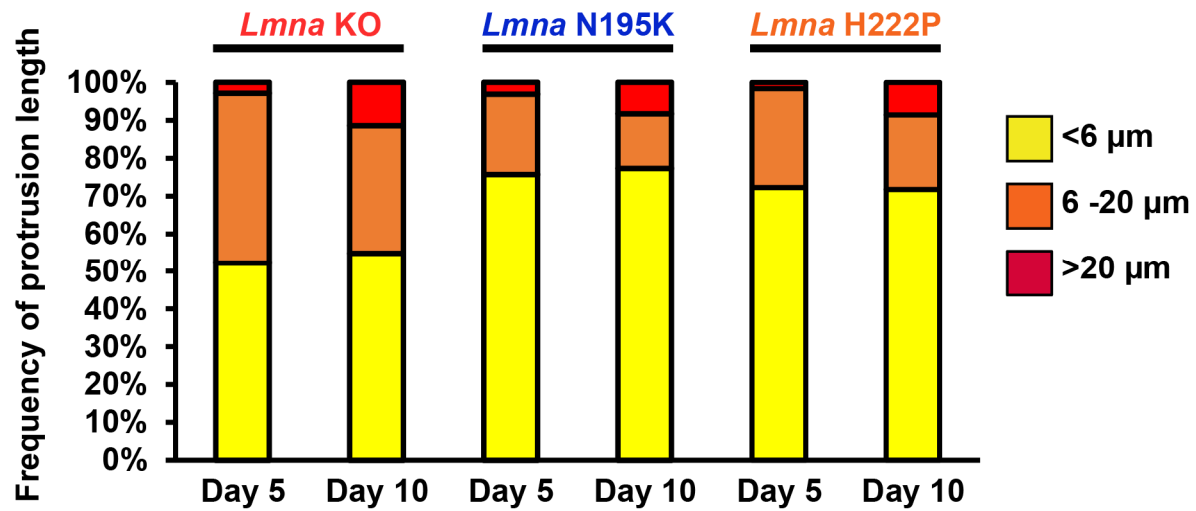

**Supplemental Figure 13.** Fraction of nuclei with severe chromatin protrusions increased over time in *Lmna* mutant myofibers. Quantification of the relative distribution of chromatin protrusion lengths in *Lmna* KO, *Lmna* N195K and *Lmna* H222P muscle cells at day 5 and day 10 of *in vitro* differentiation.

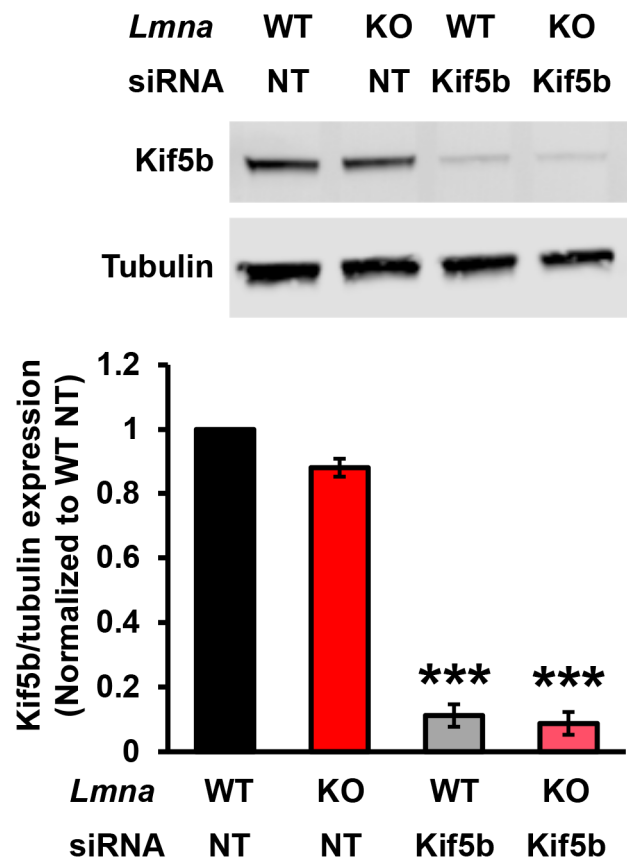

**Supplemental Figure 14.** Analysis of Kif5b depletion by siRNA. **(Top)** Western blot for Kif5b in myoblasts treated with a non-target control siRNA (siRNA NT) or siRNA against Kif5b.  $n = 3$  independent experiments. **(Bottom)** Corresponding quantification. \*\*\*,  $p < 0.001$  vs. respective genotype siRNA NT control.

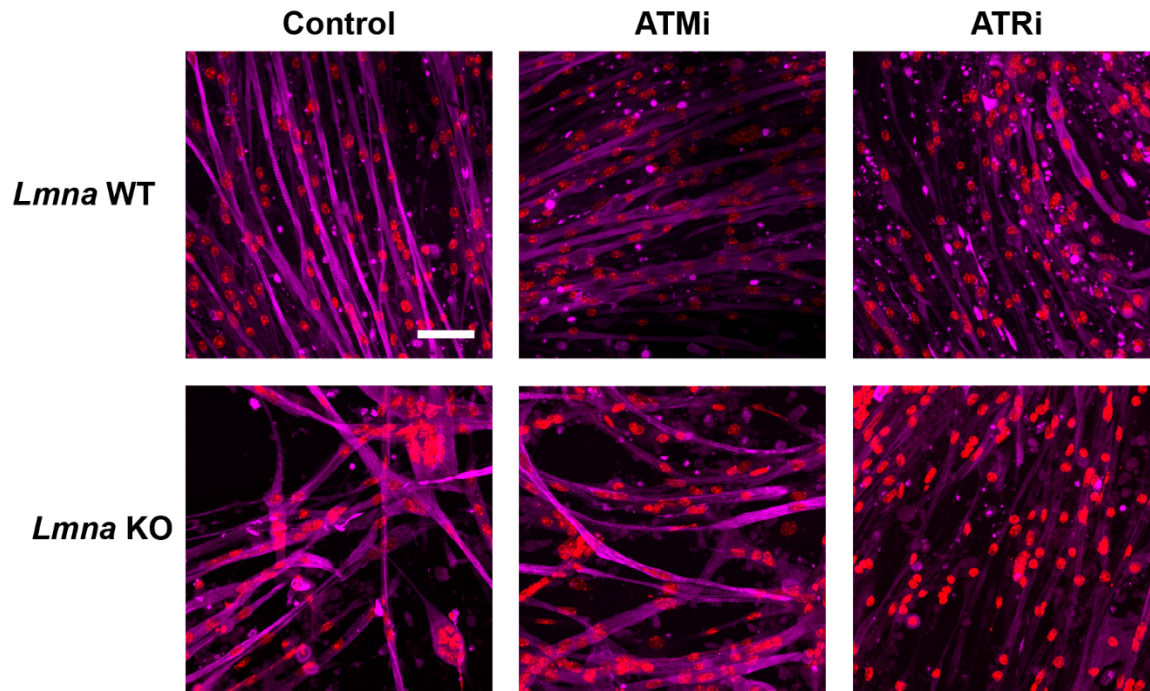

**Supplemental Figure 15.** ATM and ATR inhibition exacerbates *Lmna* KO myofiber health. Representative images of *Lmna* WT and *Lmna* KO myofibers following treatment with either an ATM inhibitor (KU55933, 5  $\mu$ M), ATR inhibitor (VE-821, 5  $\mu$ M) or DMSO vehicle control from days 7-14 of differentiation. Scale bar = 50  $\mu$ m.

## SUPPLEMENTAL MOVIES

**Supplemental Movies 1-4.** Representative movies of spontaneous contractions in *Lmna* WT, *Lmna* KO, *Lmna* N195K, and *Lmna* H222P myofibers after 10 days of differentiation.

**Supplemental Movie 5.** Representative movie of micropipette aspiration of *Lmna* WT, *Lmna* KO *Lmna* N195K, and *Lmna* H222P myoblasts.

**Supplemental Movie 6.** Representative movie of microharpoon manipulation of *Lmna* WT and *Lmna* KO myotubes after day 5 of differentiation.

**Supplemental Movie 7.** Time-lapse of nuclear envelope rupture during myonuclear spacing at 5 days of differentiation. Note the loss of NLS-GFP from the nucleus is immediately followed by the formation of a cGAS foci at the site of rupture.

**Supplemental Movie 8.** Representative movie of microharpoon manipulation of *Lmna* KO myotubes after day 5 of differentiation following 24 hour treatment with either 50 nM paclitaxel or DMSO control.

**Supplemental Movies 9-10.** Representative movies of spontaneous contractions in *Lmna* KO myofibers at 14 days of differentiation following treatment with NU7741 (1  $\mu$ M) or DMSO control during 7 to 14 days of differentiation.



## Supplemental Tables

| Antibody                   | Cat#       | Vendor            | Dilution                |
|----------------------------|------------|-------------------|-------------------------|
| MyHC                       | A4.1025    | DSHB              | 1:100                   |
| MyHC                       | MAB4470-SP | Novus Biologicals | 1:500                   |
| Lamin B (M-20)             | sc-6217    | Santa Cruz        | 1:200                   |
| Lamin B1 (B-10)            | sc-374015  | Santa Cruz        | 1:200                   |
| Lamin A (H-102)            | sc-20680   | Santa Cruz        | 1:200                   |
| Lamin A/C (E1)             | sc-376248  | Santa Cruz        | 1:200                   |
| Gamma-H2AX (Ser139)        | 80312      | Cell Signaling    | 1:200                   |
| Gamma-H2AX (Ser139)        | 9718       | Cell Signaling    | 1:200                   |
| HSP90 $\alpha/\beta$ (F-8) | sc-13119   | Santa Cruz        | 1:200                   |
| Nesprin1-E                 | MANNES1E   | Glen Morris       | 1:500                   |
| Nesprin-1-A                | MANNES1A   | Glen Morris       | 1:500                   |
| alpha-tubulin              | T9026      | Sigma             | 1:500(IF)<br>1:5000(WB) |
| NPC (414)                  | Ab50008    | Abcam             | 1:500                   |
| Emerin                     | NCL-EMERIN | Leica             | 1:200                   |
| DNA-PKcs (S2056)           | ab18192    | Abcam             | 1:1000                  |
| DNA-PKcs                   | sc-390849  | Santa Cruz        | 1:750                   |
| Cleaved Caspase-3          | 9661       | Cell Signaling    | 1:500                   |

**Supplemental Table 1. Antibodies and corresponding dilutions.** Primary antibodies for immunofluorescence staining and western blotting.
